# Supplementary material for: HLA-DR Expression on Monocytes and Sepsis Index Are Useful in Predicting Sepsis
Source: MDPI journal article supplement (doi:10.3390/biomedicines11071836), 2023-06-26
Supplement: s1 [file s1]

**Supplementary Table 1. Candidate biomarkers for predictive outcome in total cohort of patients.**

| Data measured                             | Total cohort<br>n=77 |               |               |              |               |             |
|-------------------------------------------|----------------------|---------------|---------------|--------------|---------------|-------------|
|                                           | Basal                | Day +3        | Day+6         | Day +9       | Day +12       | Day +15     |
| PCR (mg/ml)                               | 71.90±76.71          | 161.83±133.42 | 153.76±151.02 | 109.99±71.82 | 125.78±136.53 | 144.05±172  |
| Lymphocyte count (cell/uL)                | 1261±646             | 1190±640      | 1302±627      | 1449±1243    | 1649±1351     | 1737±1459   |
| Percentage of CD14+ HLA-DR+ monocytes (%) | 83.94±16.52          | 83.72±15.35   | 83.59±16.8    | 85.98±15.54  | 87.08±13.44   | 85.26±18.99 |
| MFI of CD14+ HLA-DR+ monocytes            | 1941±1206            | 2218±1710     | 2253±1398     | 2792±2121    | 2791±2421     | 2779±1699   |
| HLA-DR Index                              | 1.55±0.91            | 1.81±1.45     | 1.16±1.02     | 1.26±1.15    | 1.42±0.82     | 1.47±0.77   |
| Sepsis Index                              | 0.11±0.13            | 0.16±0.18     | 0.12±0.15     | 0.1±0.12     | 0.15±0.17     | 0.65±0.89   |

**Supplementary Table 2. Candidate biomarkers for predictive outcome in Septic and Non-Septic patients.**

|                                           | Septic cohort     |                |               |                |                 |                 |
|-------------------------------------------|-------------------|----------------|---------------|----------------|-----------------|-----------------|
|                                           | Basal<br>n=55     | Day +3<br>n=55 | Day+6<br>n=48 | Day +9<br>n=45 | Day +12<br>n=39 | Day +15<br>n=24 |
| PCR (mg/ml)                               | 80.16±78.07       | 182.9±132.9    | 171.9±155     | 124.8±68.39    | 132.88±138.23   | 155.7±189.63    |
| Lymphocyte count (cell/uL)                | 1235±645          | 1091±529       | 1312±633      | 1515±1320      | 1711±1386       | 800.36±523.80   |
| Percentage of CD14+ HLA-DR+ monocytes (%) | 82.42±17.9        | 81.7±16.22     | 81.29±18.01   | 86.35±11.48    | 87.01±13.74     | 80.54±21.56     |
| MFI of CD14+ HLA-DR+ monocytes            | 1902±1223         | 1933±1198      | 2026±1241     | 2634±1953      | 2603±1786       | 1873±1396       |
| HLA-DR Index                              | 1.50±0.97         | 1.76±1.59      | 1.23±1.14     | 1.32±1.19      | 1.45±0.80       | 1.28±0.91       |
| Sepsis Index                              | 0.13±0.14         | 0.19±0.19      | 0.15±0.17     | 0.11±0.13      | 0.15±0.17       | 1.03±0.48       |
|                                           | Non-Septic cohort |                |               |                |                 |                 |
|                                           | Basal<br>n=22     | Day +3<br>n=22 | Day+6<br>n=22 | Day +9<br>n=13 | Day +12<br>n=9  | Day +15<br>n=1  |
| PCR (mg/ml)                               | 44.84±68.93       | 93.46±117.6    | 38.73±12.13   | 30.77±12.76    | 137.64±105.85   | 85,8            |
| Lymphocyte count (cell/uL)                | 1266±625          | 1474±862       | 1251±657      | 915±534        | 857±448         | 500             |
| Percentage of CD14+ HLA-DR+ monocytes (%) | 87.22±12.36       | 88.53±12.13    | 89.08±11.93   | 93.67±6.3      | 85.1±12.47      | 83              |
| MFI of CD14+ HLA-DR+ monocytes            | 2046±1214         | 2942±2552      | 2689±1541     | 2865±2022      | 2079±1976       | 1570            |
| HLA-DR Index                              | 1.69±0.75         | 1.95±1.04      | 0.95±0.58     | 0.93±0.97      | 1.26±0.96       | 1,34            |
| Sepsis Index                              | 0.06±0.05         | 0.08±0.08      | 0.06±0.05     | 0.04±0.02      | 0.18±0.16       | 0,74            |
|                                           | p-value           |                |               |                |                 |                 |
|                                           | Basal             | Day +3         | Day+6         | Day +9         | Day +12         | Day +15         |
| PCR (mg/ml)                               | 0.140             | 0.030          | 0.050         | 0.030          |                 |                 |
| Lymphocyte count (cell/uL)                | 0.870             | 0.140          | 0.690         | 0.090          | 0.050           |                 |
| Percentage of CD14+ HLA-DR+ monocytes (%) | 0.670             | 0.040          | 0.070         | 0.060          | 0.660           |                 |
| MFI of CD14+ HLA-DR+ monocytes            | 0.560             | 0.110          | 0.160         | 0.760          | 0.200           |                 |

|              |       |              |              |              |       |  |
|--------------|-------|--------------|--------------|--------------|-------|--|
| HLA-DR Index | 0.110 | 0.170        | 0.550        | 0.130        | 0.600 |  |
| Sepsis Index | 0.090 | <b>0.010</b> | <b>0.020</b> | <b>0.030</b> | 0.610 |  |
